# Supplementary material for: Chemical Characterization and Cytotoxic and Antioxidant Activity Evaluation of the Ethanol Extract from the Bulbs of Pancratium maritimun Collected in Sicily
Source: MDPI journal article supplement (doi:10.3390/molecules28103986), 2023-05-09
Supplement: s1 [file s1]

## Supplementary material

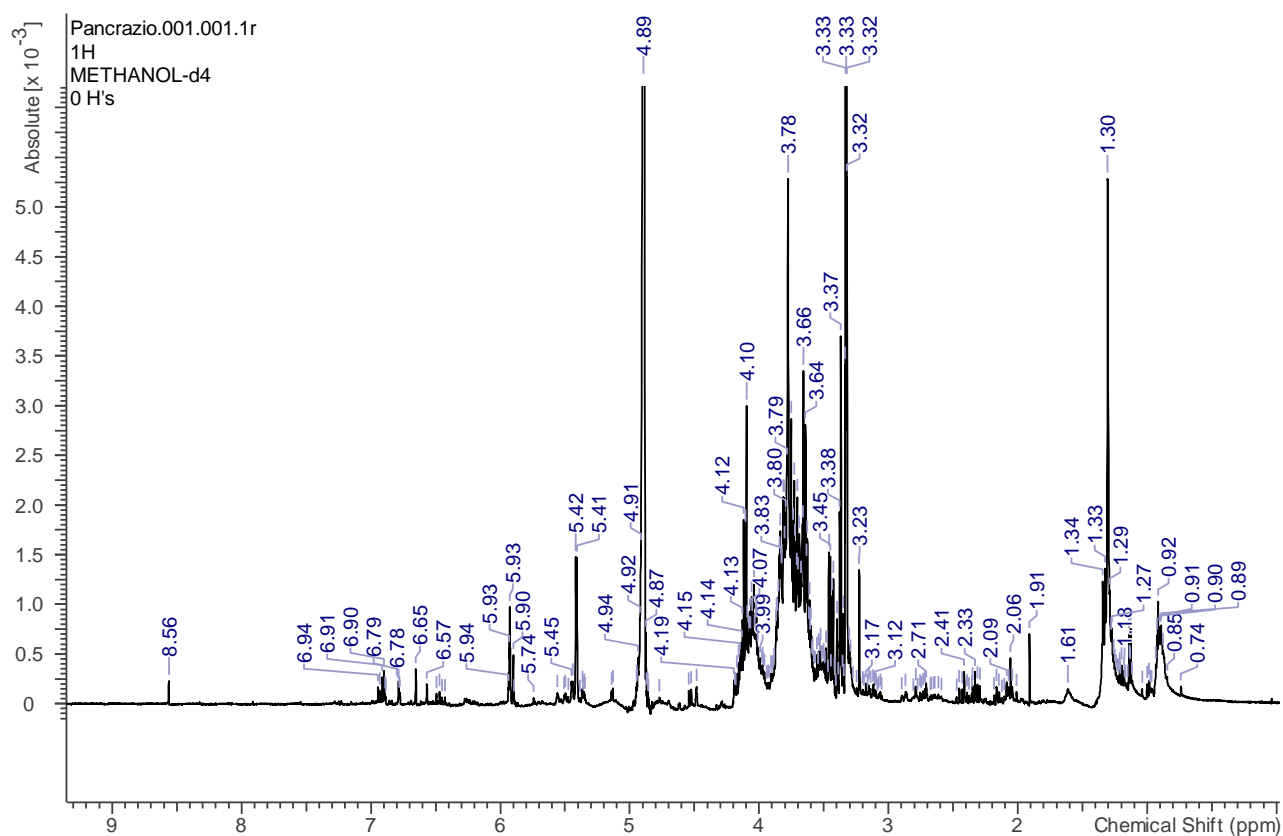

**Figure S1:**  $^1\text{H}$ -NMR of *Pancratium* bulb extract.

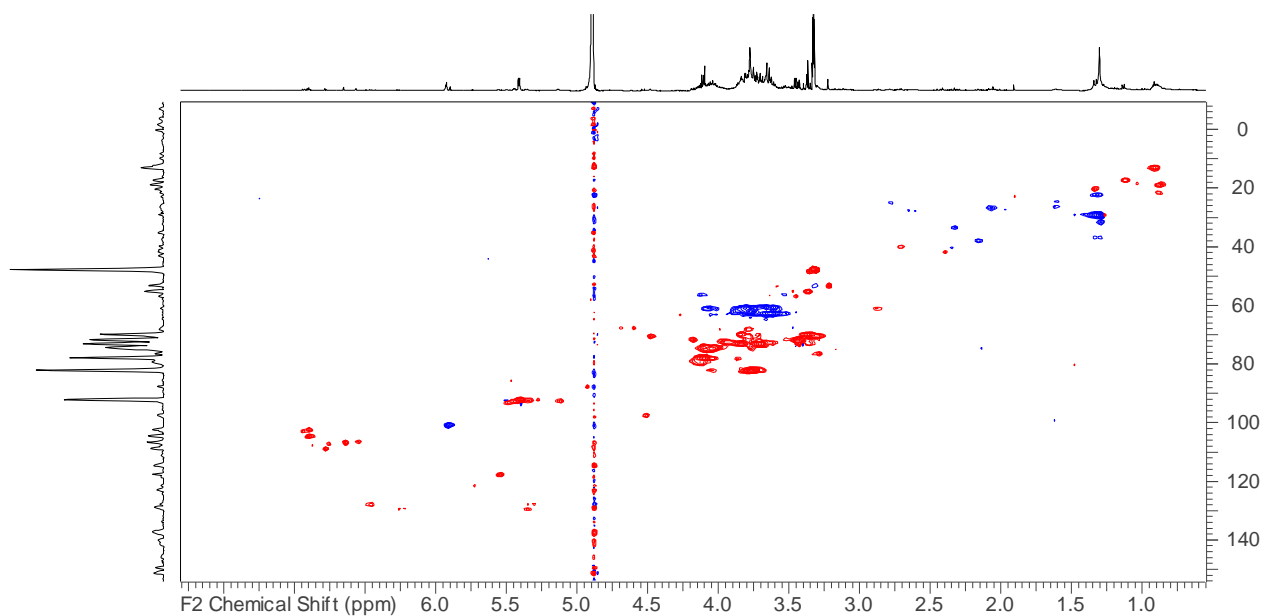

**Figure S2:** HSQC-DEPT of *Pancratium* bulb extract.

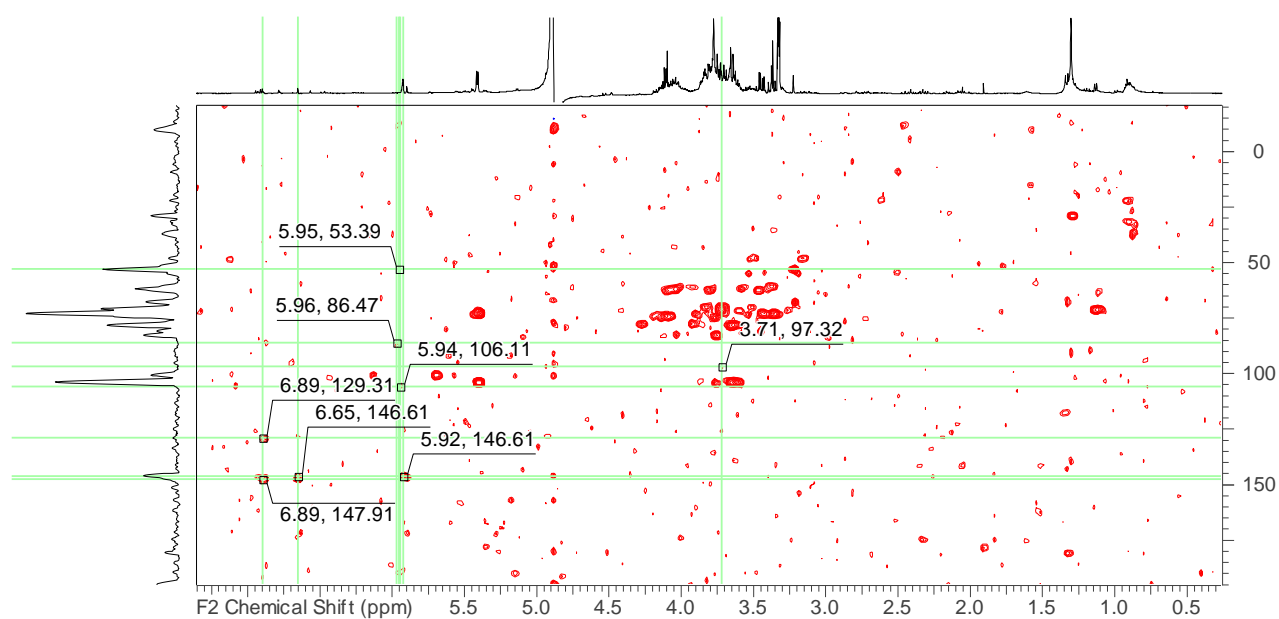

**Figure S3:** HMBC of *Pancratium* bulb extract.

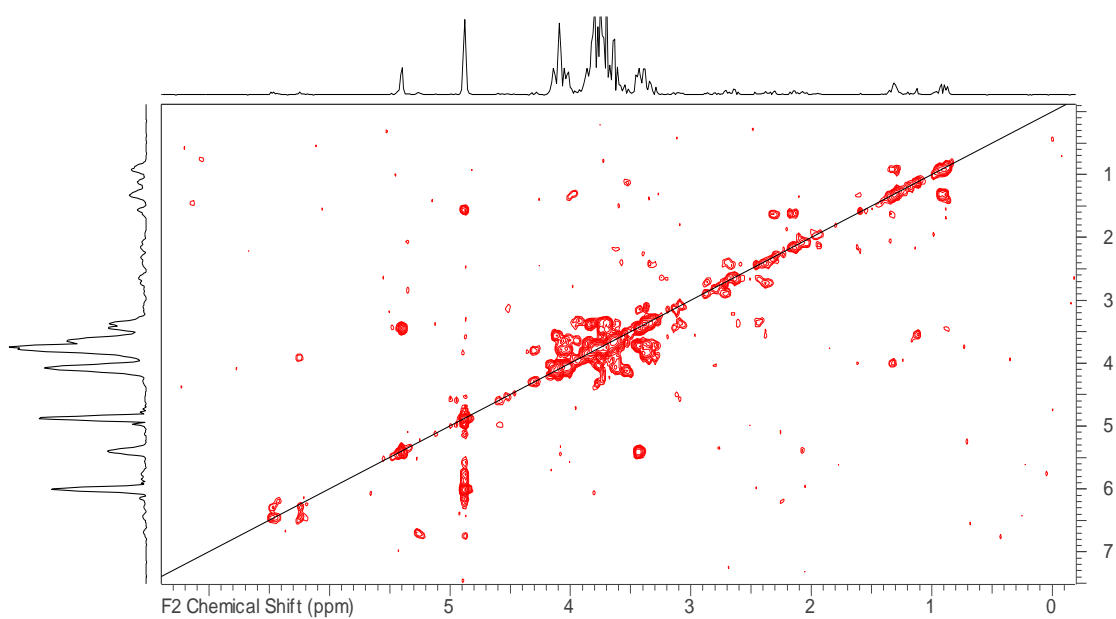

**Figure S4:** COSY of *Pancratium* bulb extract.

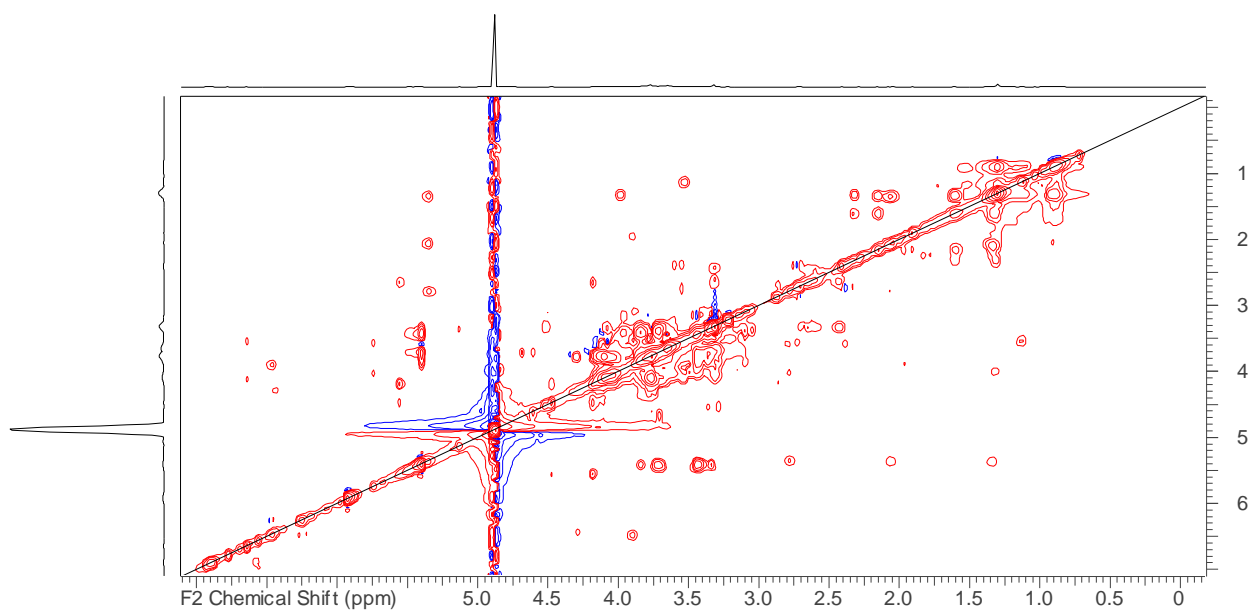

**Figure S5:** TOCSY of *Pancratium* bulb extract.

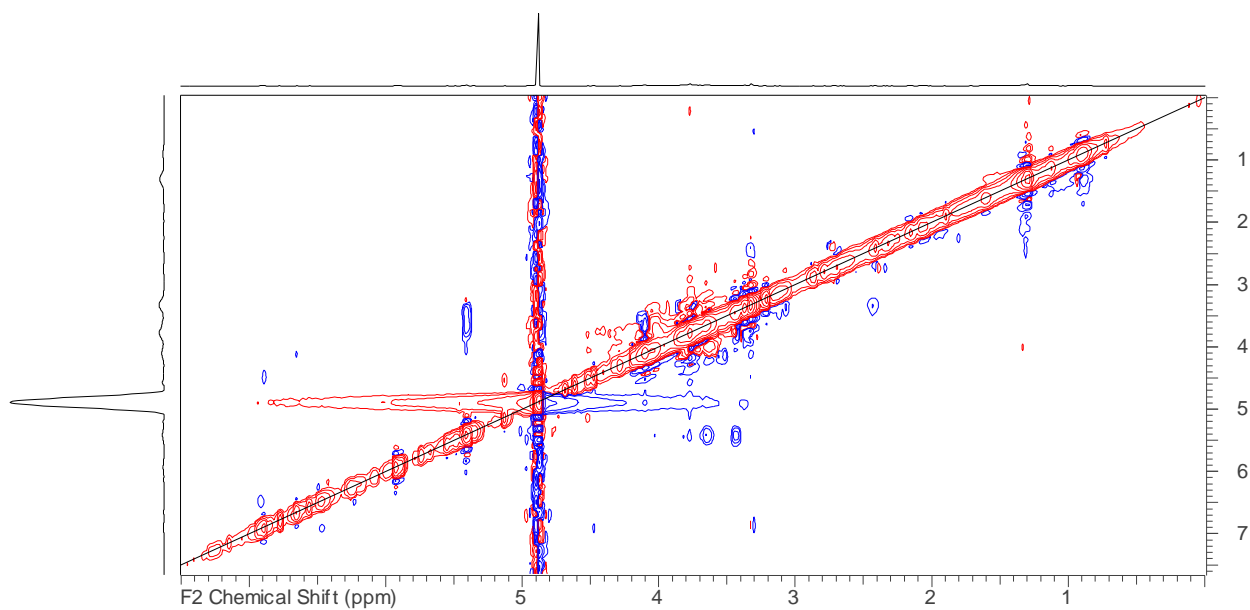

**Figure S6:** NOESY of *Pancratium* bulb extract.

**Table S1:** Principal assignments of identified alkaloids in Bulb extract as obtained from NMR spectra.

| Lycorin type            | F2 (ppm)  | F1 (ppm) | HMBC  | COSY/TOCSY | NOESY |
|-------------------------|-----------|----------|-------|------------|-------|
| 1                       | 4.57      | 70.51    |       |            | 6.98  |
| 2                       | 4.27      | 71.78    |       |            |       |
| 3                       | 5.64      | 117.73   |       |            |       |
| 4                       | 2.42      | 33.72    |       | 3.32       |       |
| 5                       | 3.32      | 52.97    |       | 3.32       |       |
| 7                       | 3.46      | 55.45    |       |            |       |
| 8                       | 6.74      | 107.08   |       |            |       |
| 11b                     | 2.96      | 60.98    |       |            |       |
| 11                      | 6.98      | 104.85   | 147.9 |            | 4.57  |
| 12                      | 6.02      | 101.07   | 147.9 |            |       |
| Crinamidine type        |           |          |       |            |       |
| 1                       | 3.77      | 56.2     |       |            | 6.56  |
| 2                       | 3.26      | 53.3     |       | 4.46       |       |
| 3                       | 4.46      | 70.8     |       | 3.26       |       |
| 6                       | 4.19-3.53 | 56.4     |       |            |       |
| 10                      | 6.56      | 103.5    |       |            |       |
| 12                      | 3.31-2.43 | 53.1     |       |            |       |
| Oduline/Lycorenine type |           |          |       |            |       |
| 6                       | 5.93      | 97.10    |       | 125.1      |       |
| N-CH3                   | 2.30      | 44.3     |       |            |       |
| 3                       | 5.53      | 117.3    |       | 3.18       |       |

LC-MS data chromatograms and MS fragmentation spectras

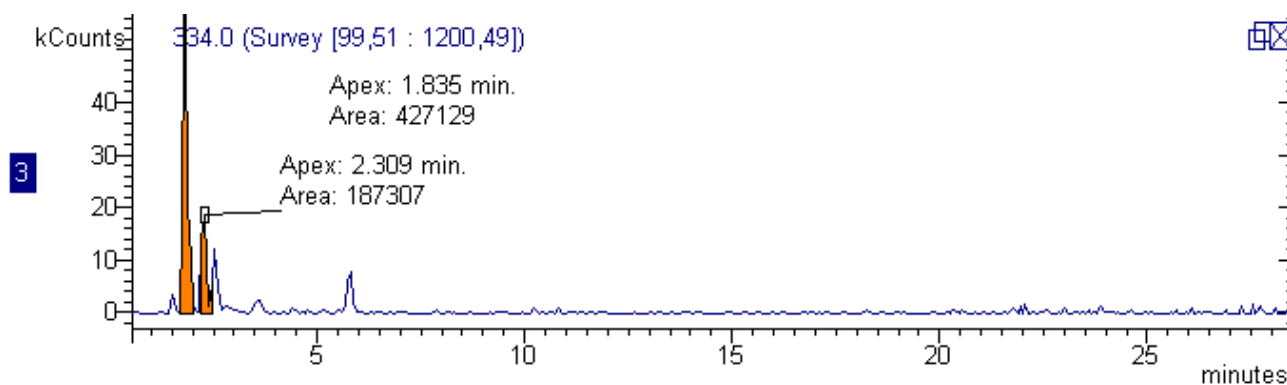

**Figure S7:** chromatogram related to specie at  $m/z$  334.

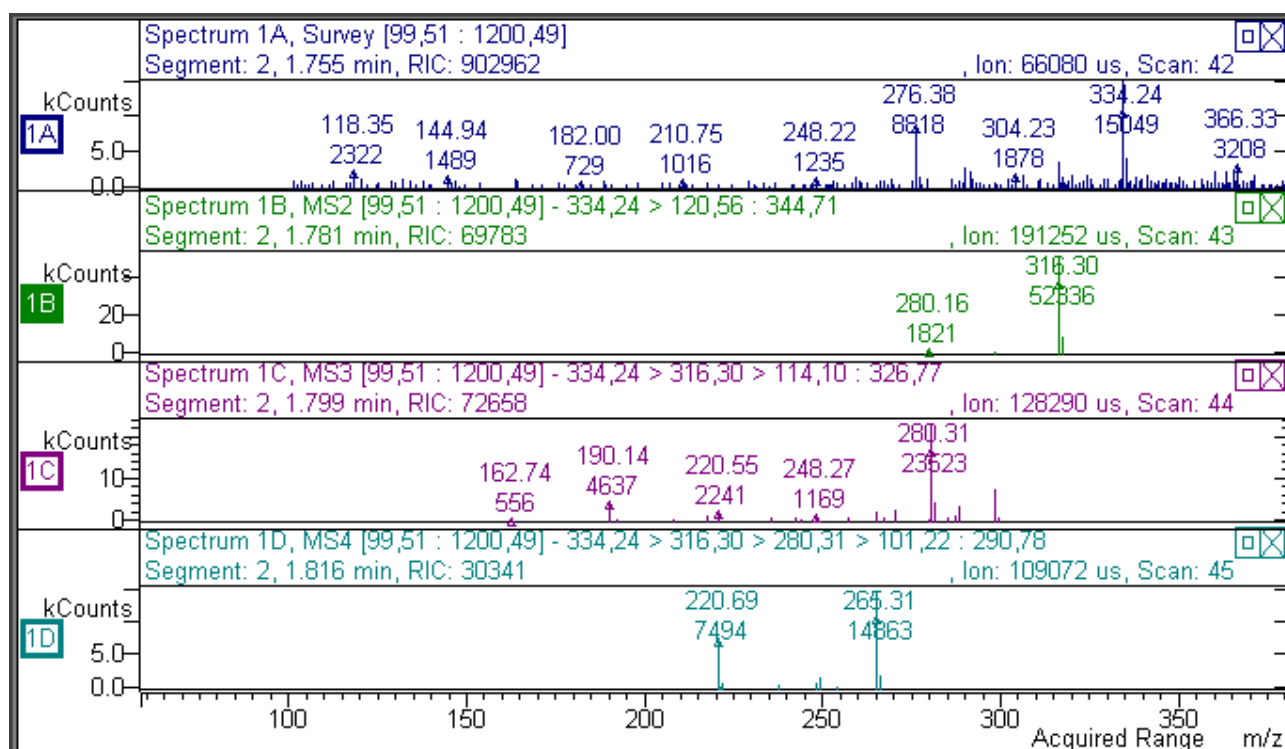

Figure S8: specie at  $m/z$  334, RT 1.7 min.

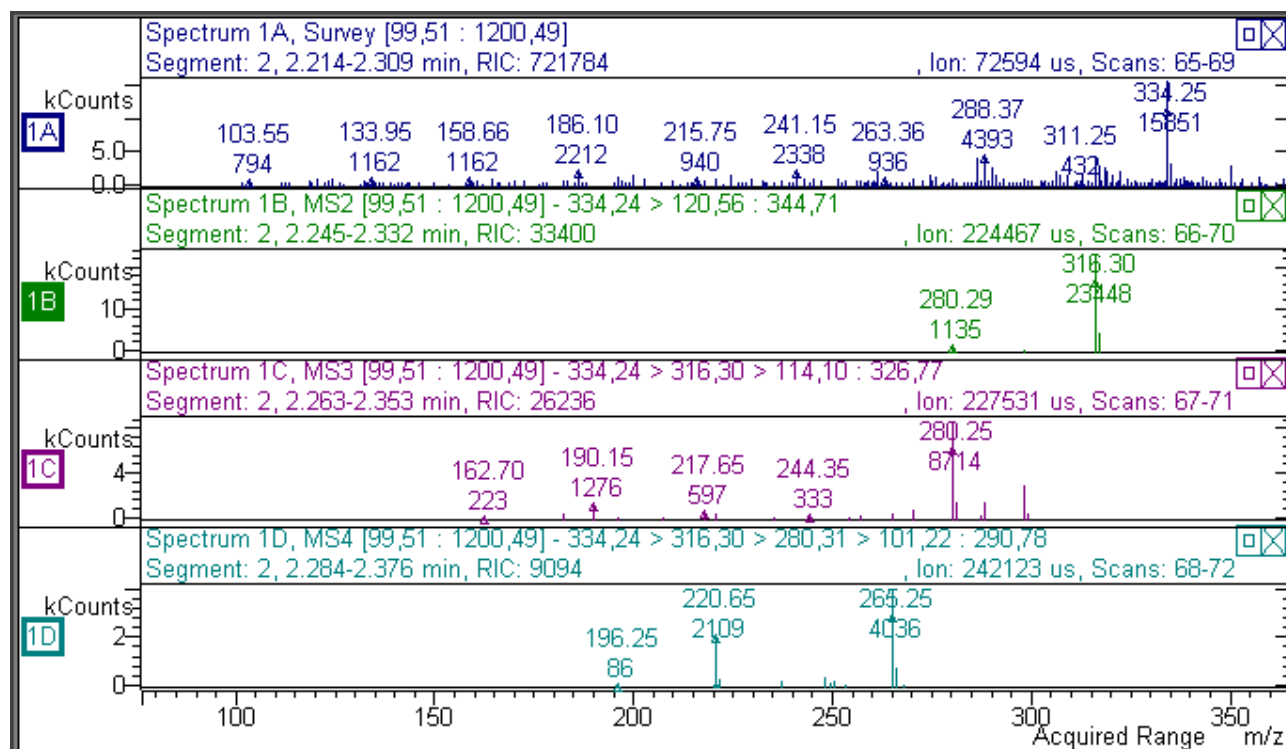

Figure S9: specie at  $m/z$  334, RT 2,3 min.

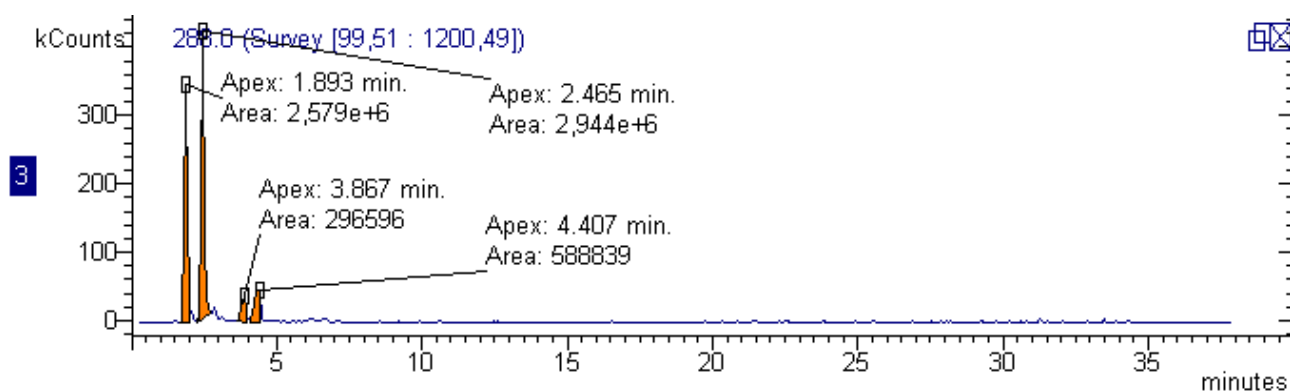

Figure S10: chromatogram related to specie at  $m/z$  288.

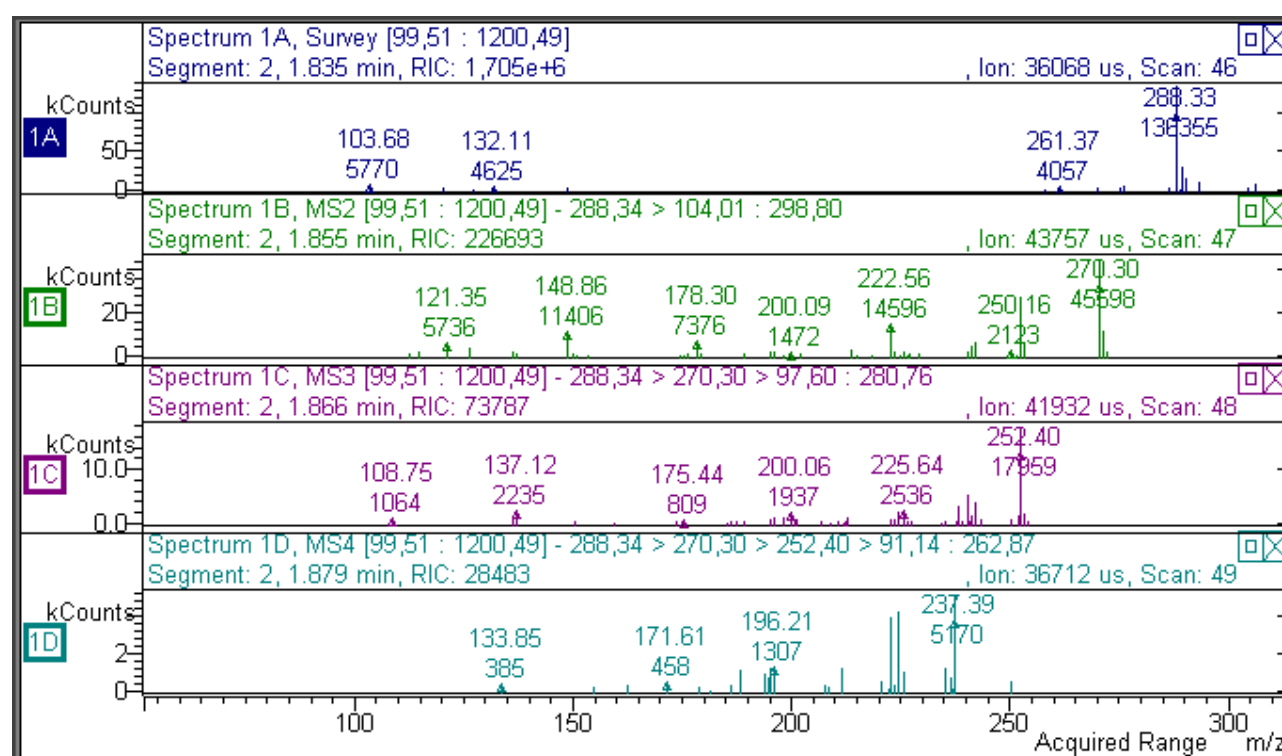

Figure S11: specie at  $m/z$  288 lycorine RT 1,9 min.

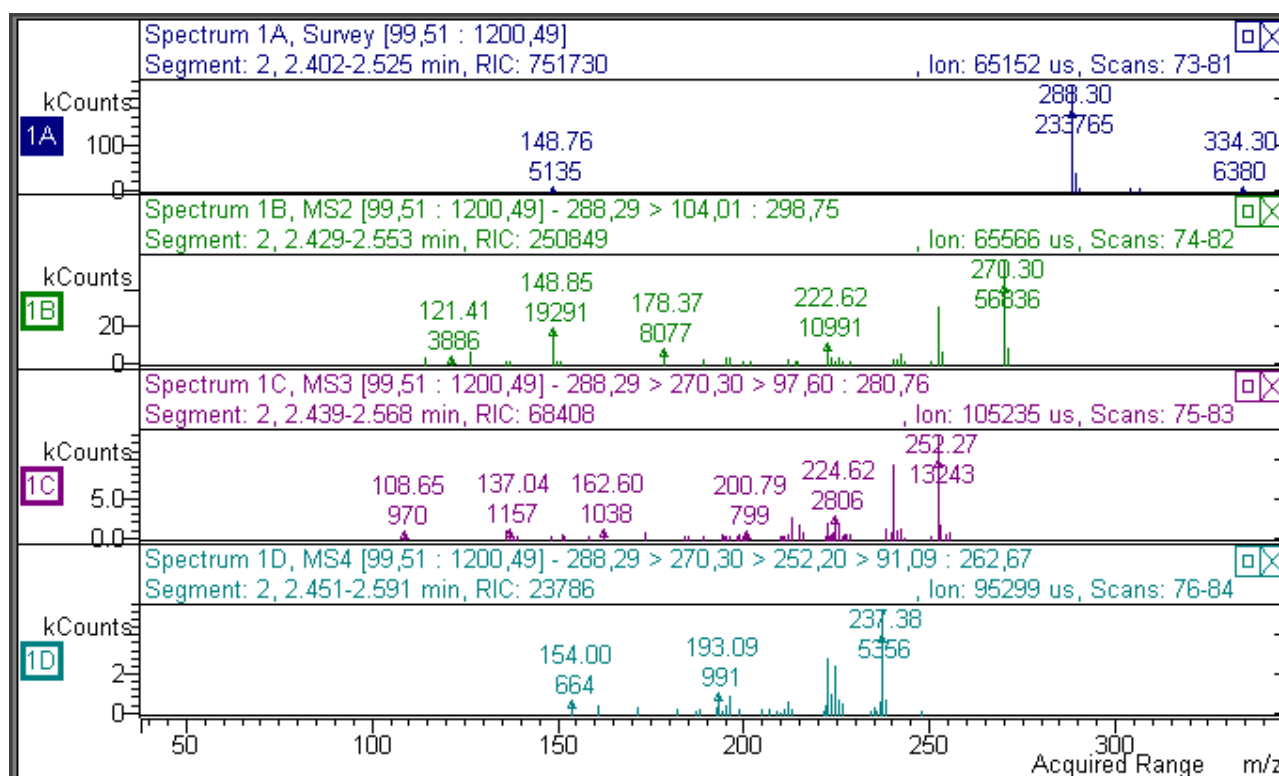

**Figure S12:** specie at  $m/z$  288 epilycorine RT 2.45 min.

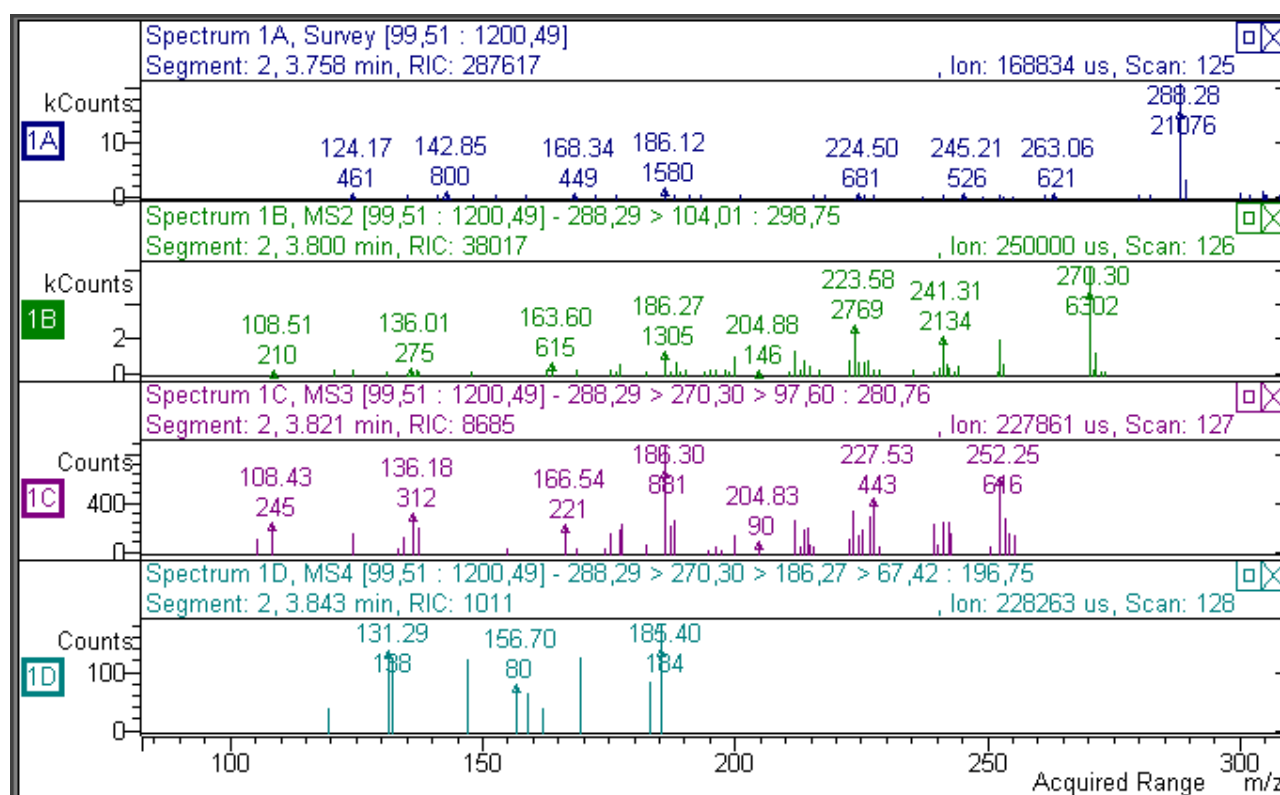

**Figure S13:** specie at  $m/z$  288 lycorine type RT 3.8 min.

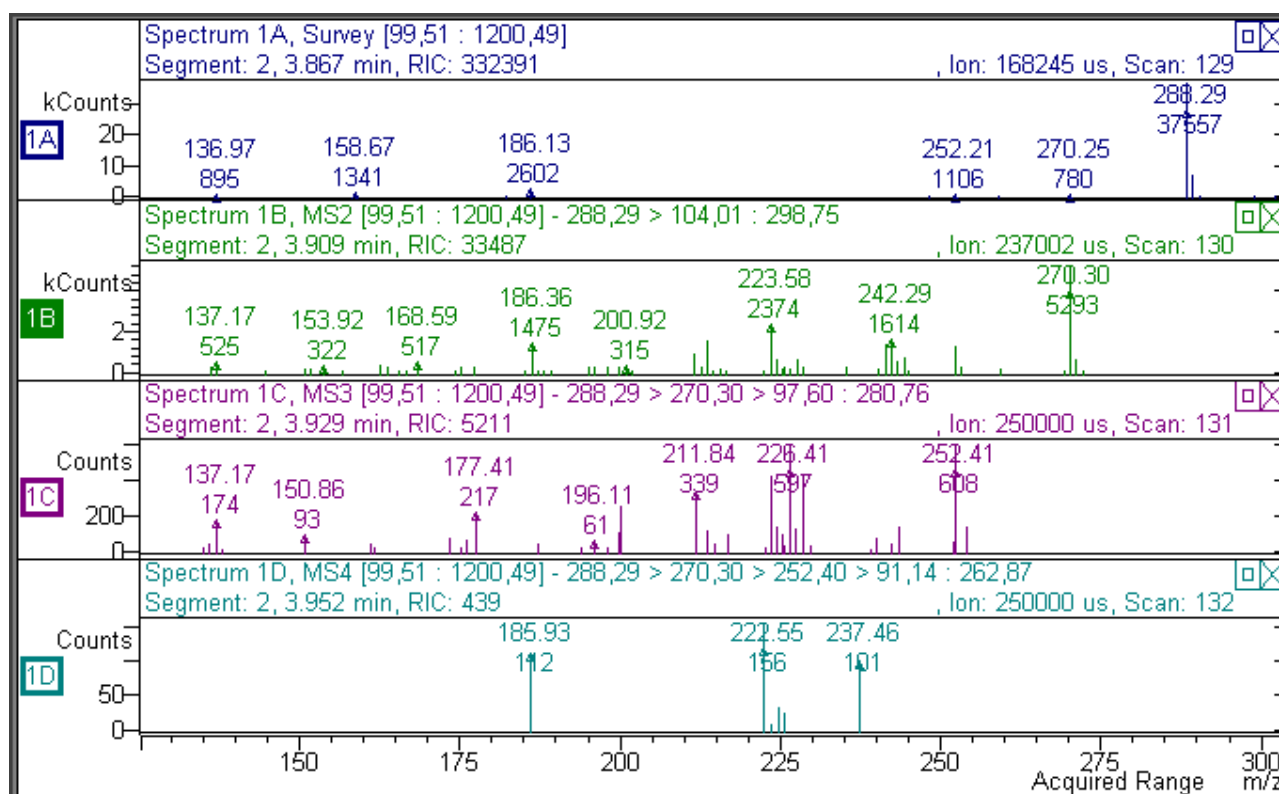

Figure S14: specie at  $m/z$  288 lycorine type RT 3.9 min.

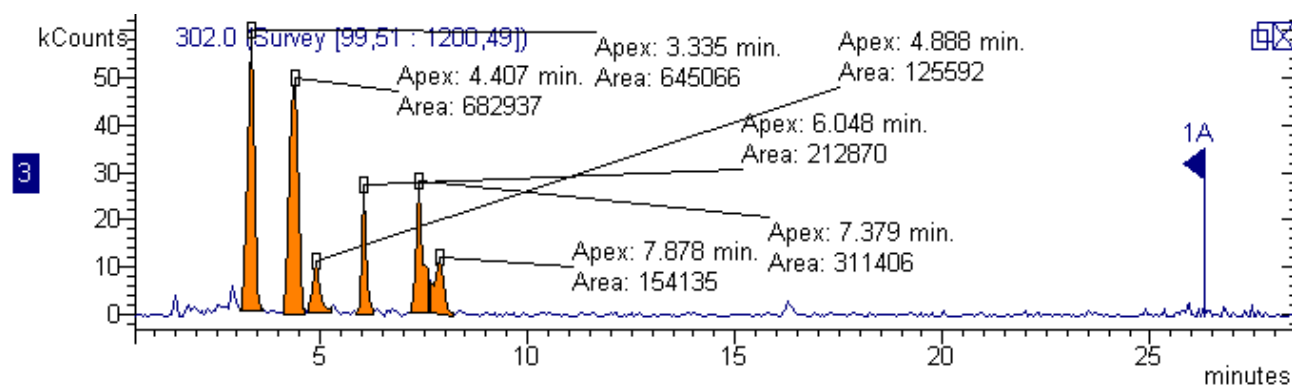

Figure S15: chromatogram related to specie at  $m/z$  302.



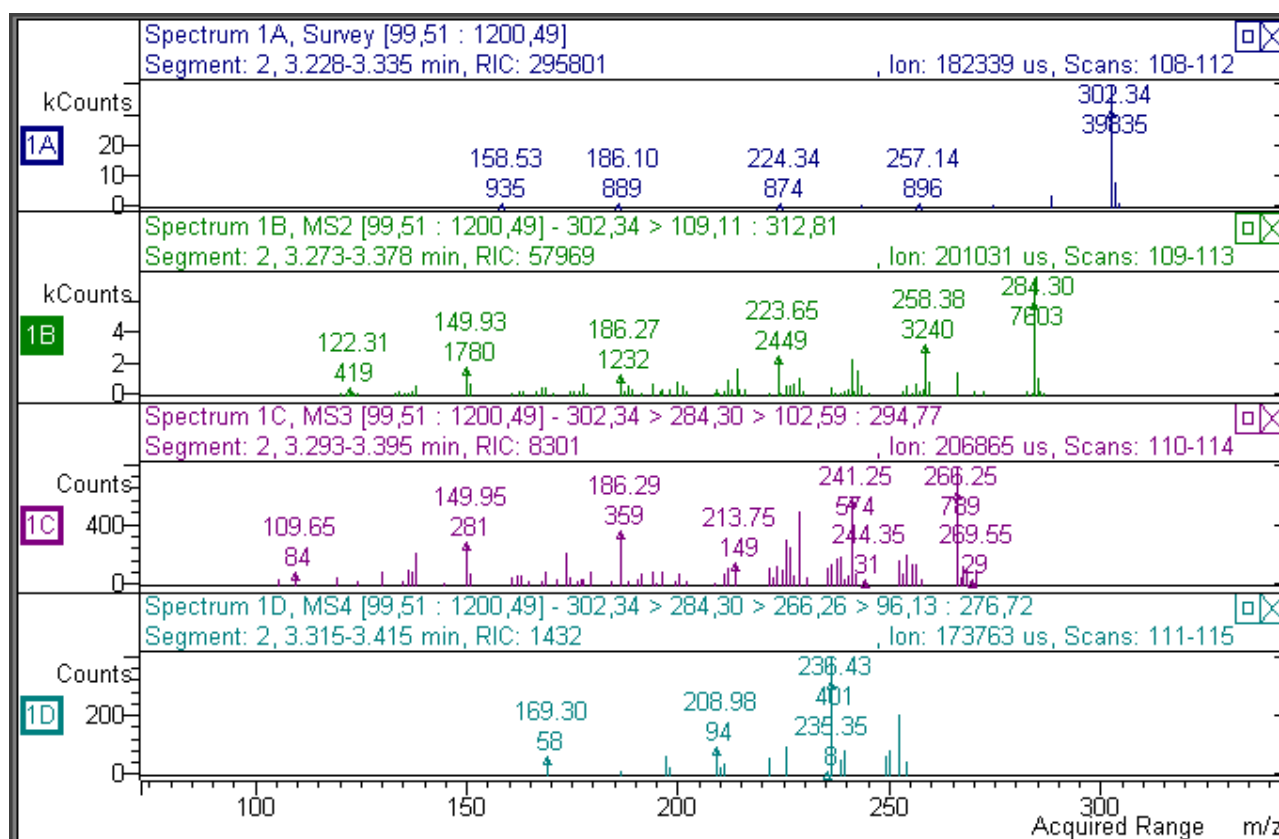

**Figure S16:** specie at  $m/z$  302 oduline RT 3.3 min.

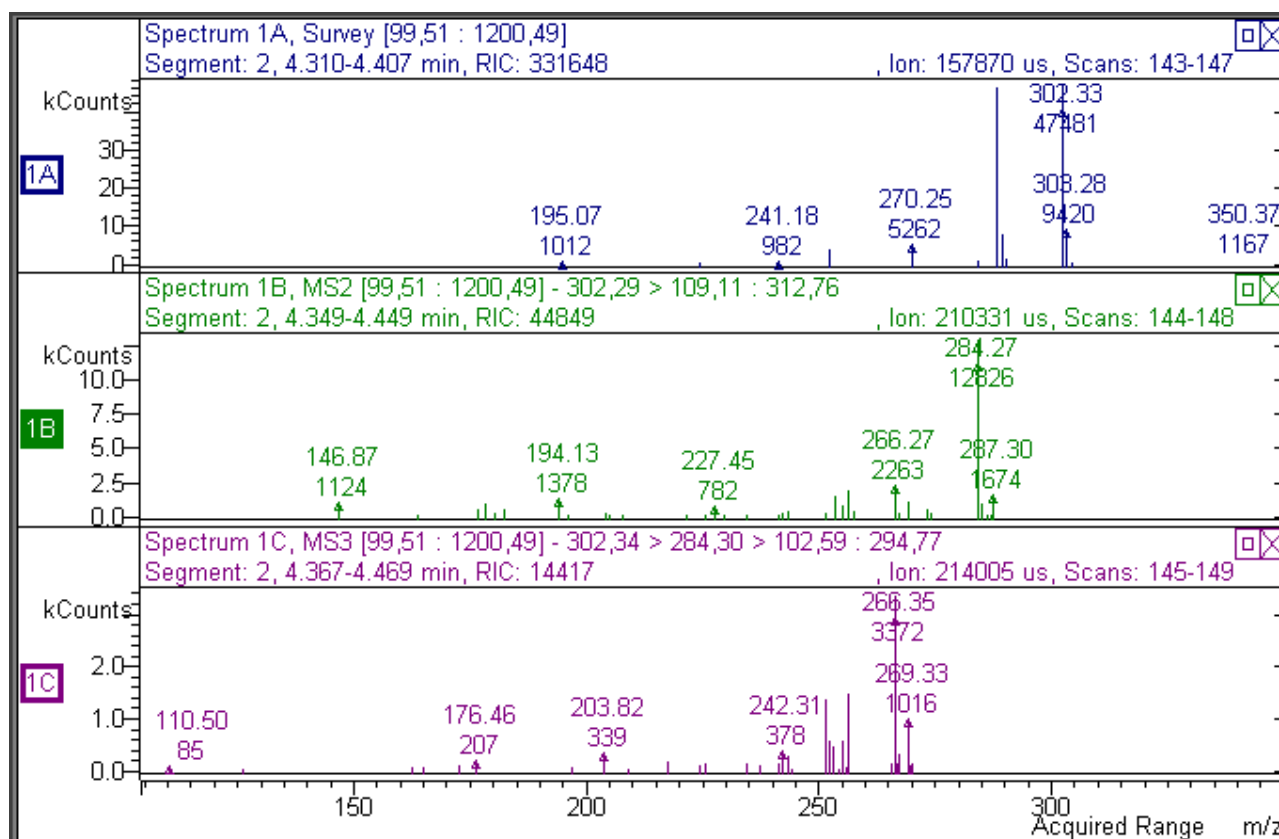

**Figure S17:** specie at  $m/z$  302 RT 4.4 min.

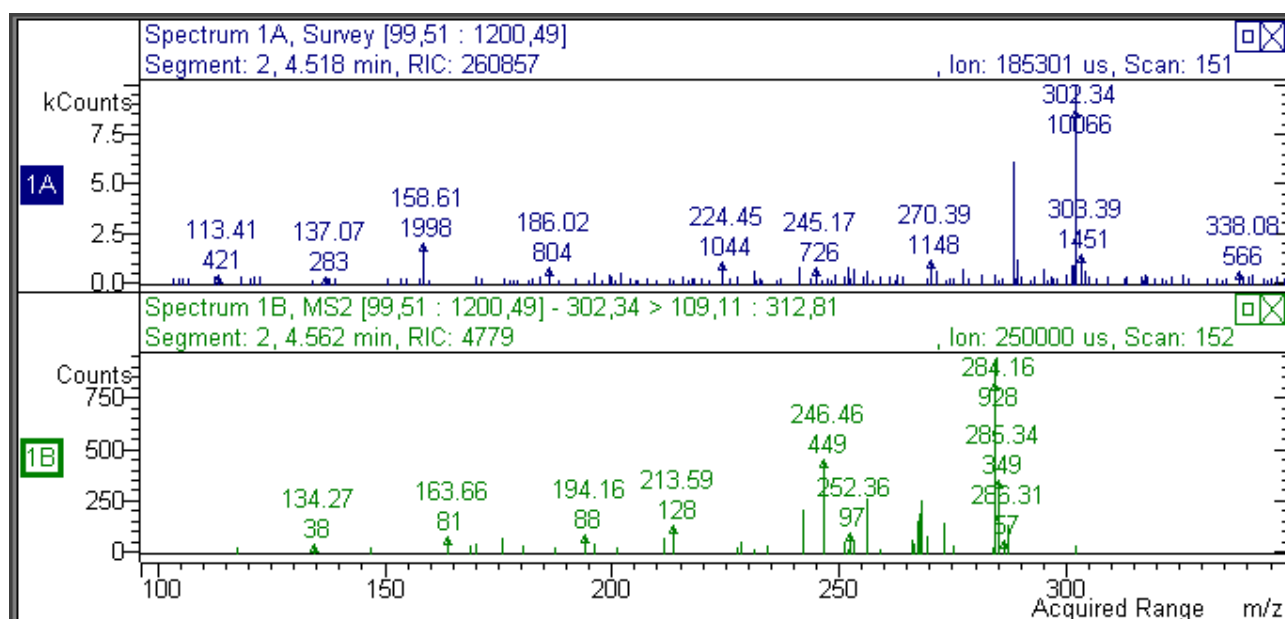

**Figure S18:** specie at  $m/z$  302 RT 4.5 min.

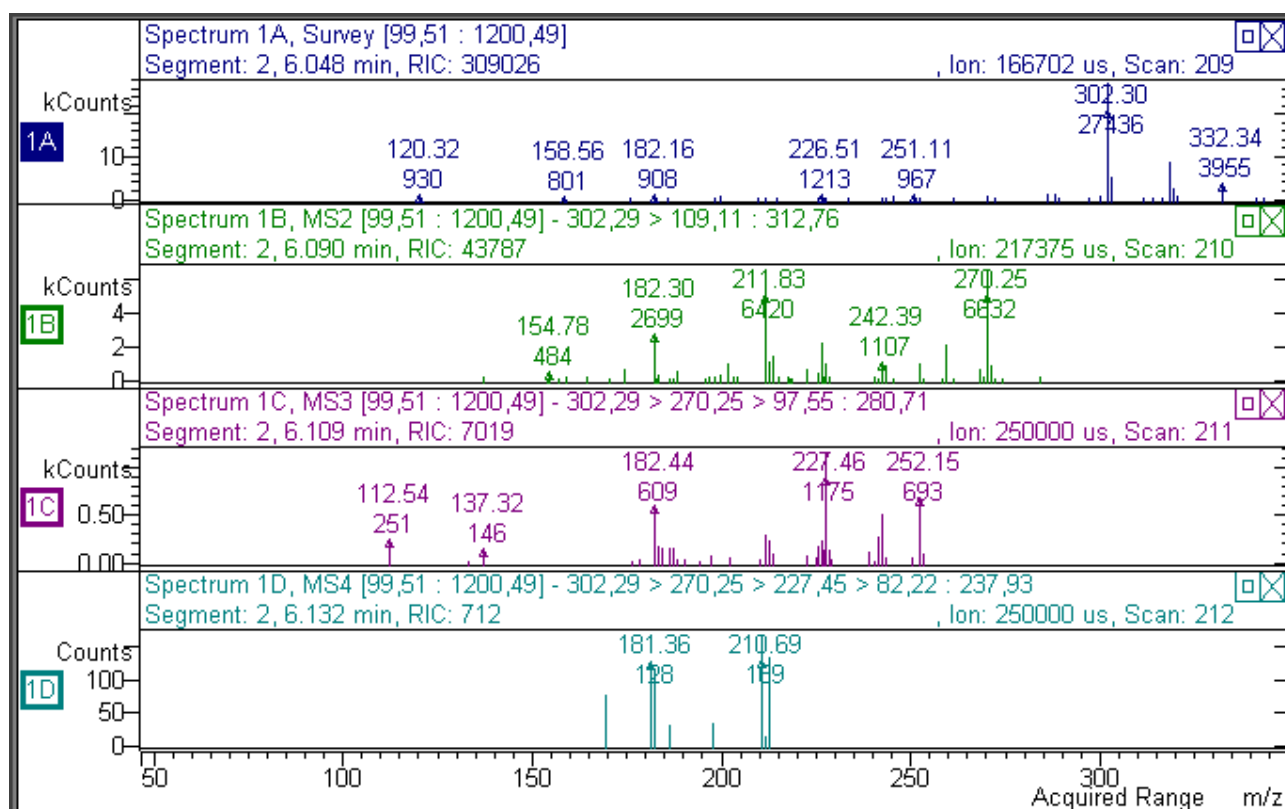

**Figure S19:** specie at  $m/z$  302 RT 6.0 min lycorine derivatives.

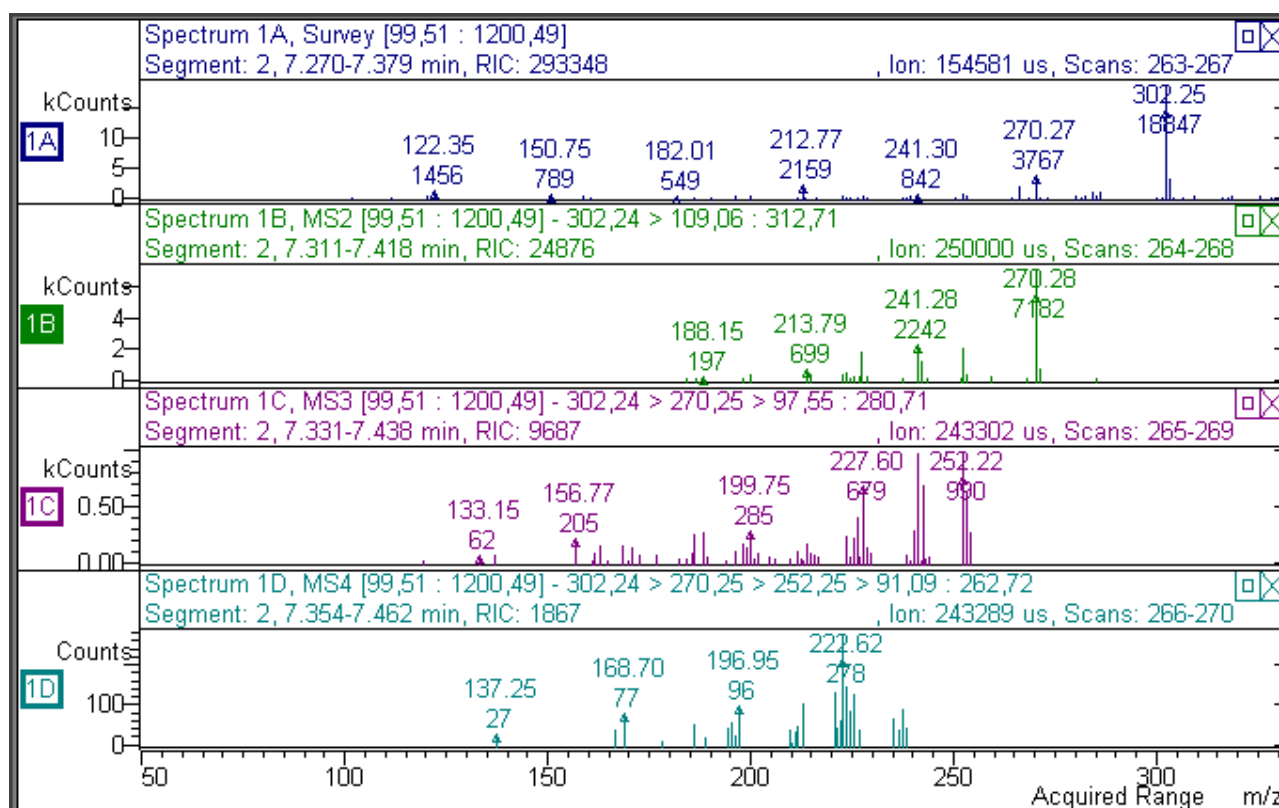

**Figure S20:** specie at  $m/z$  302 RT 7.3 min.

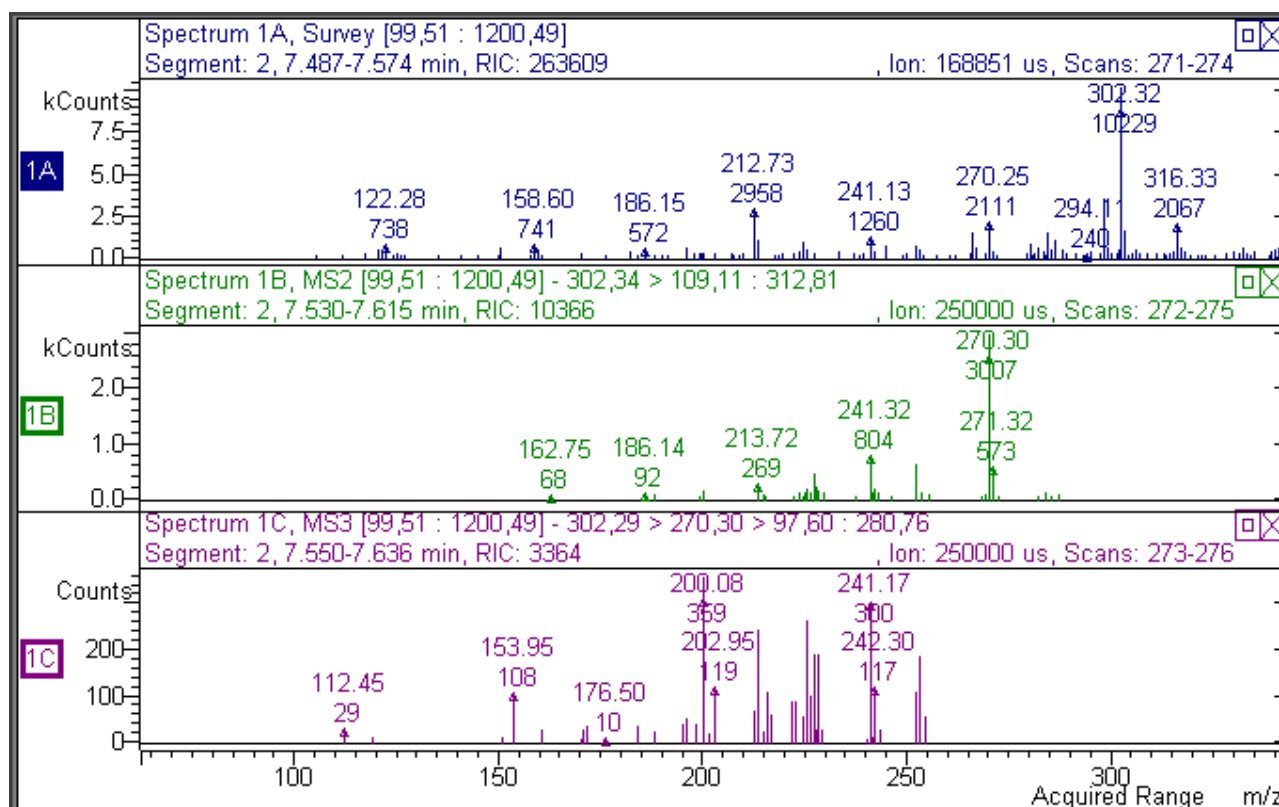

**Figure S21:** specie at  $m/z$  302 RT 7.84 min.

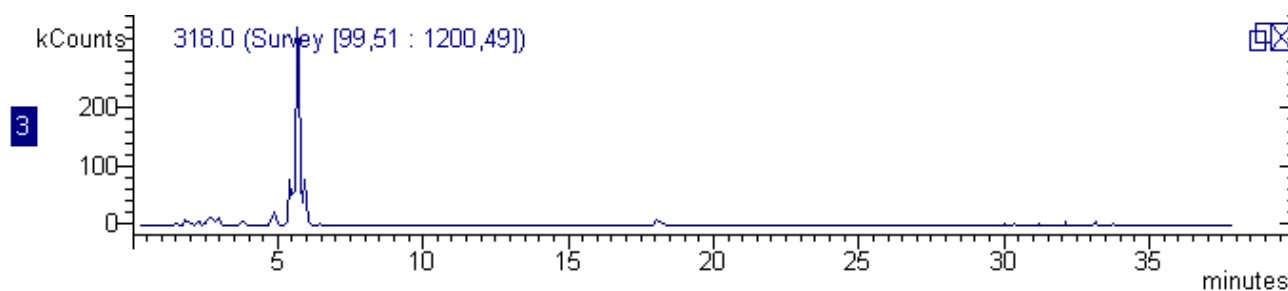

**Figure S22:** chromatogram related to specie at  $m/z$  318.

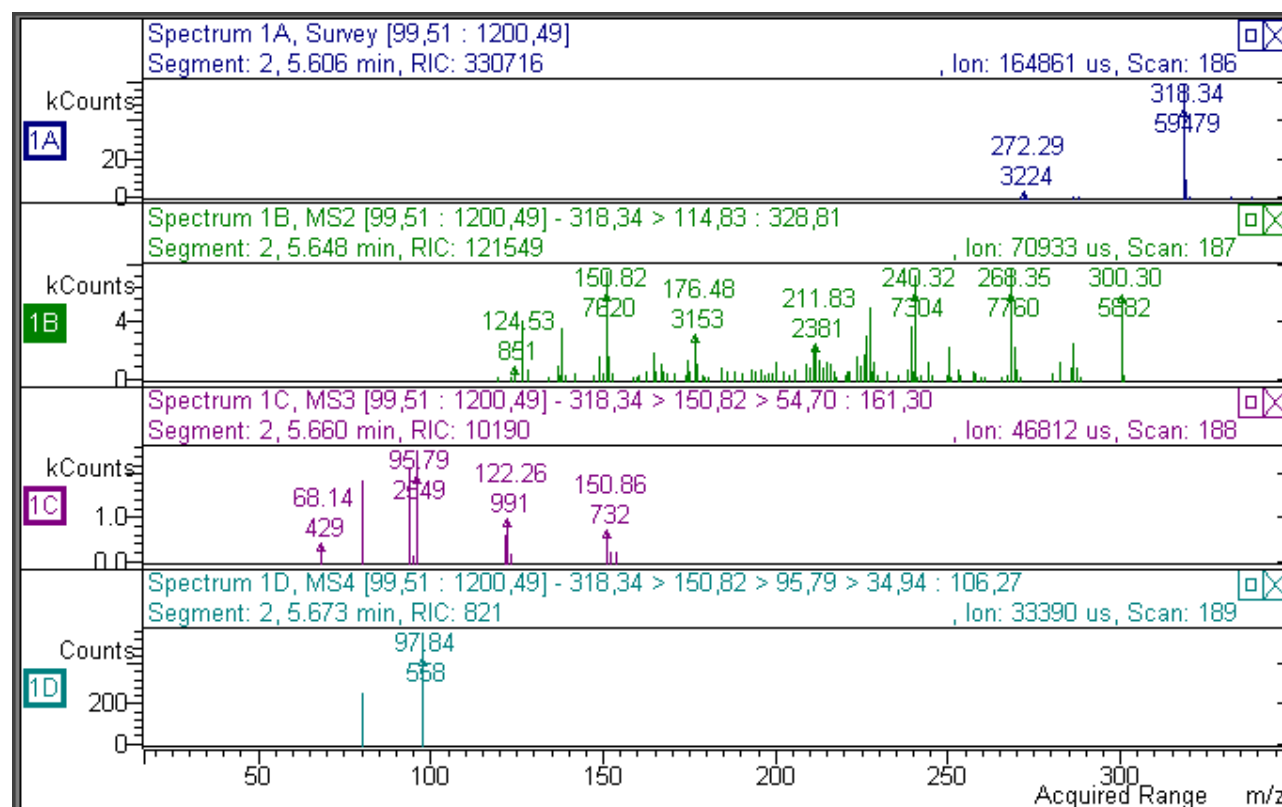

**Figure S23:** specie at  $m/z$  318 crinamidine RT 5.6 min.

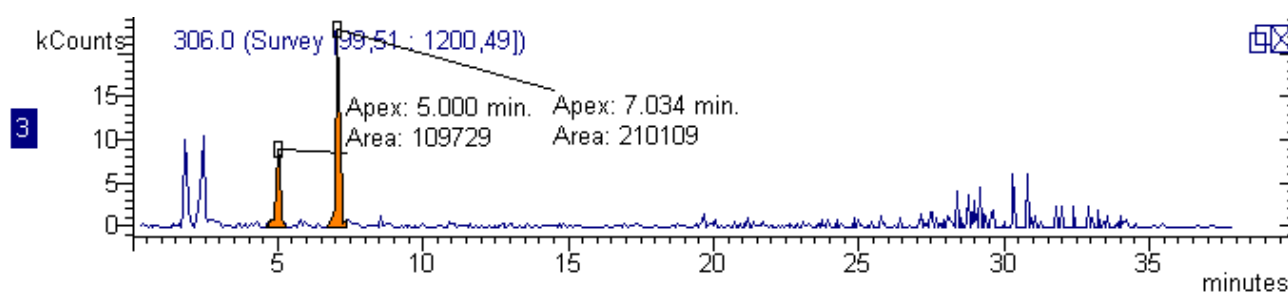

**Figure S24:** chromatogram related to specie at  $m/z$  306.

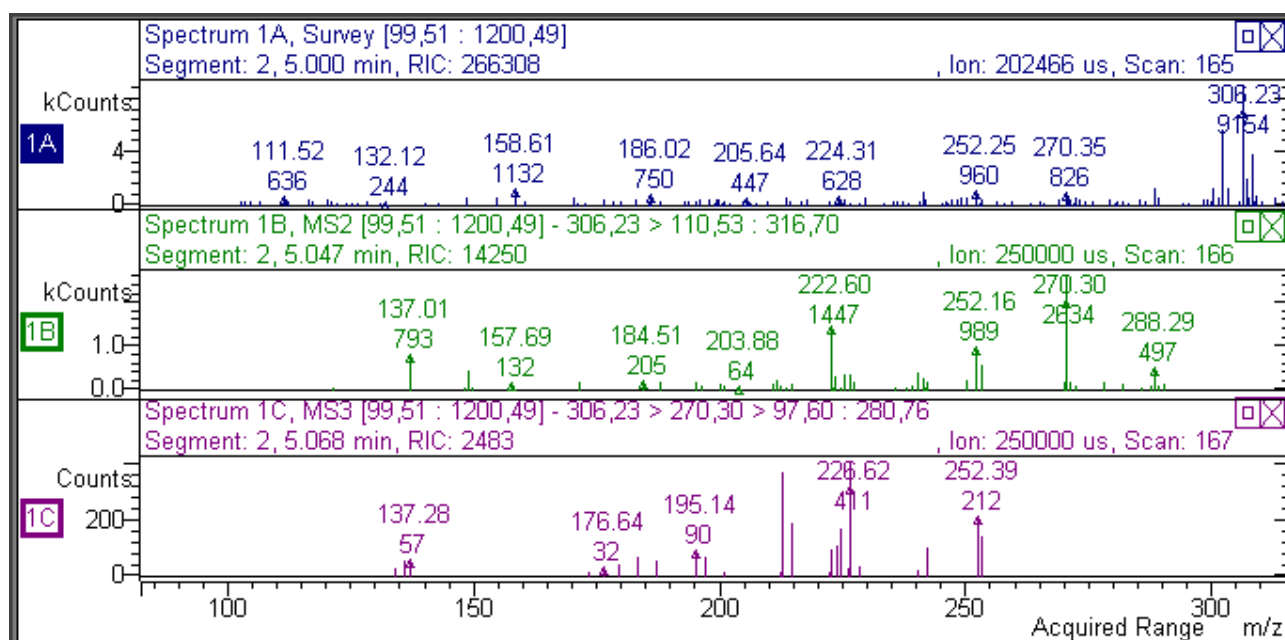

**Figure S25:** specie at  $m/z$  306 RT 5 min.

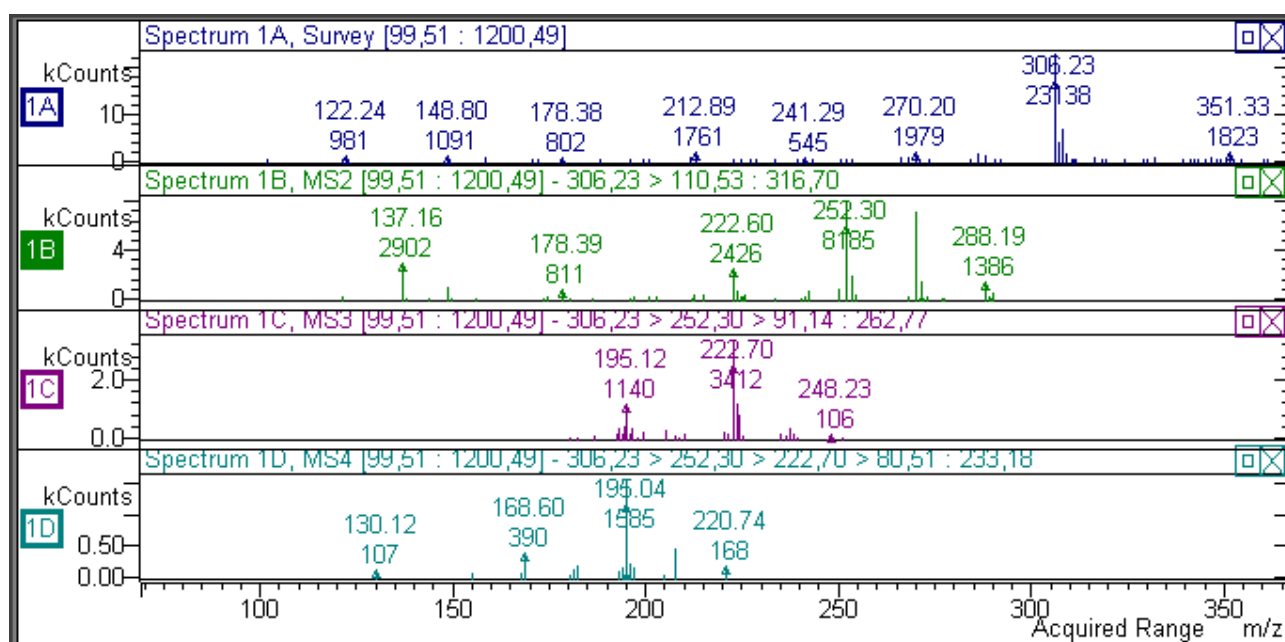

**Figure S26:** specie at  $m/z$  306 RT 7 min.

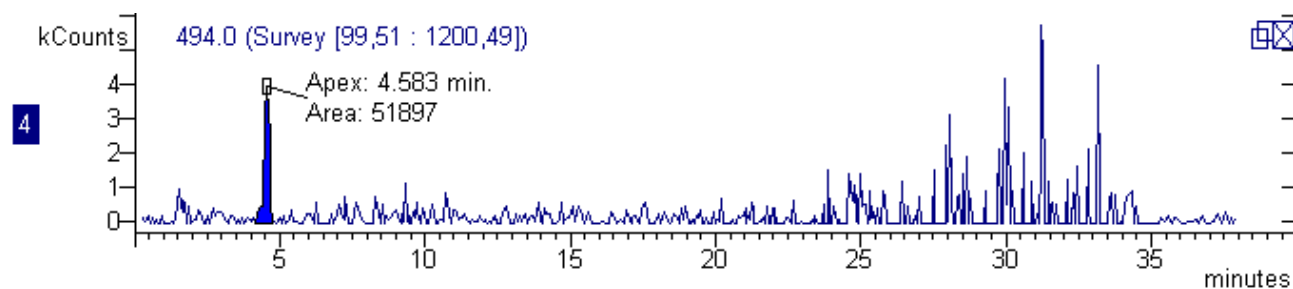

**Figure S27:** chromatogram related to specie at  $m/z$  494.

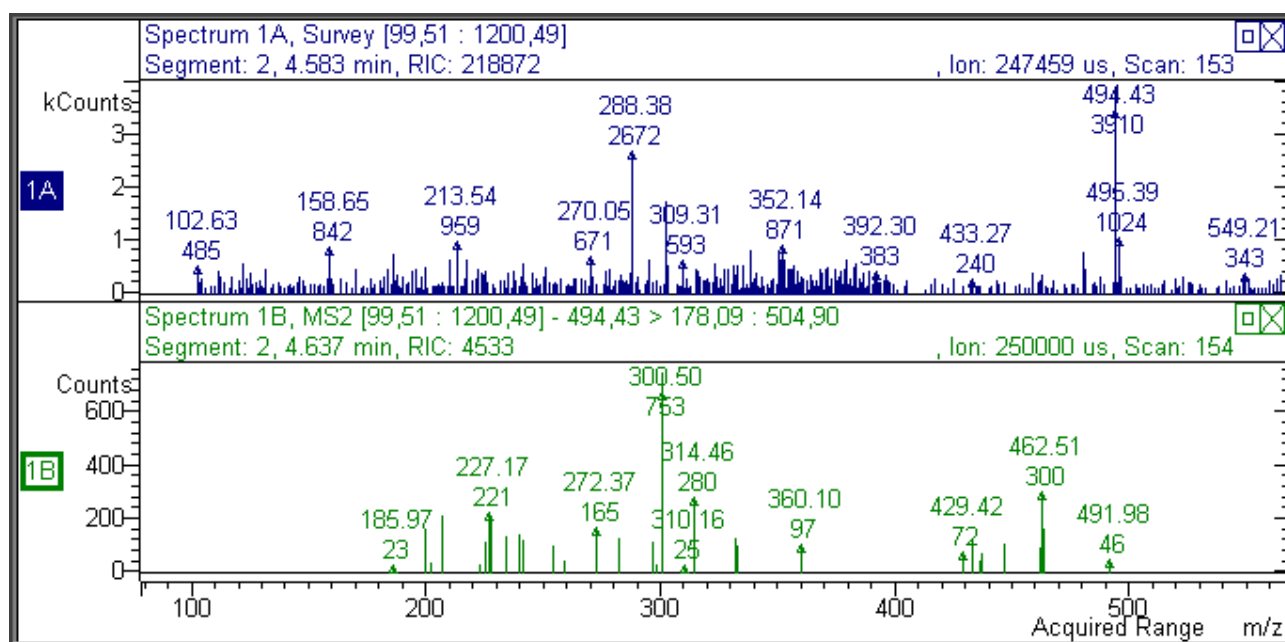

**Figure S28:** specie at  $m/z$  494 RT 4.5 min.
